# Supplementary material
Source: Springer Nature journal article supplement (https://www.springermedizin.de/resource/supplementary/12886_2004_32_MOESM1_ESM.pdf/9474396)

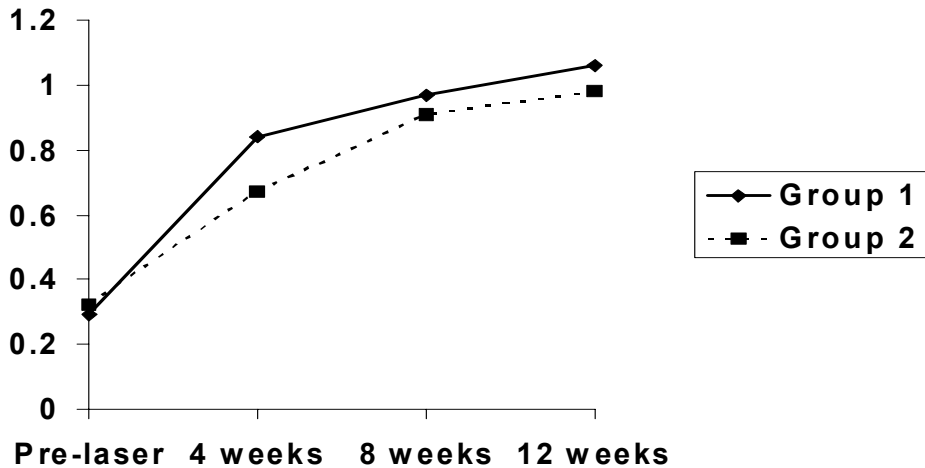

Supplement: MOESM1 [file 9474396]
